# Supplementary material
Source: MDPI journal article supplement (https://www.mdpi.com/2504-5377/3/1/11)
Supplement: s1 [file s1]

## Supplementary materials

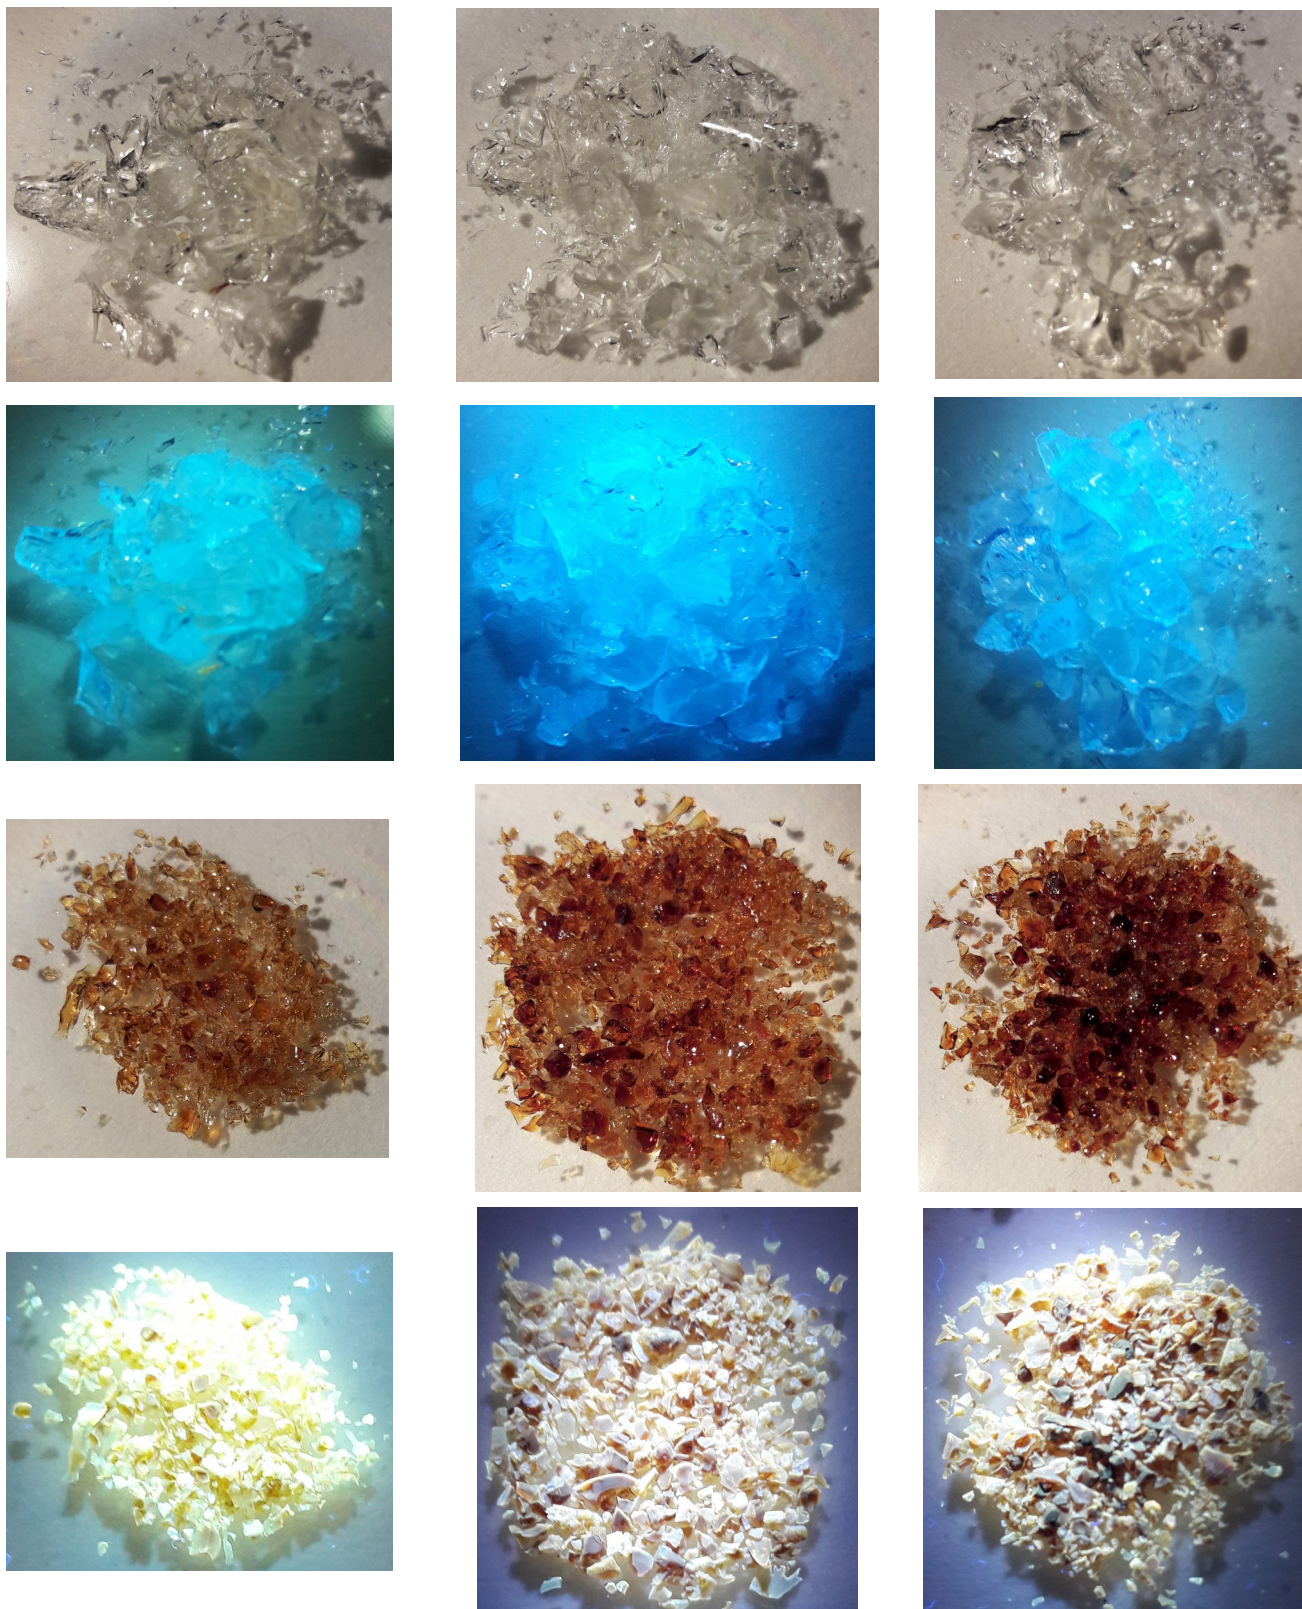

Figure S1: photographs of the sol-gel glasses obtained from silicate-citrate-ureate precursors. From left to right: citric acid-to-urea ratio 1:1, 1:1.5, 1:3. Top down: dried at 105°C and exposed to white flashlight irradiation; dried at 105°C and exposed to UV-blue flashlight irradiation; thermally treated at 270°C and exposed to white flashlight irradiation; thermally treated at 270°C and exposed to UV-blue flashlight irradiation



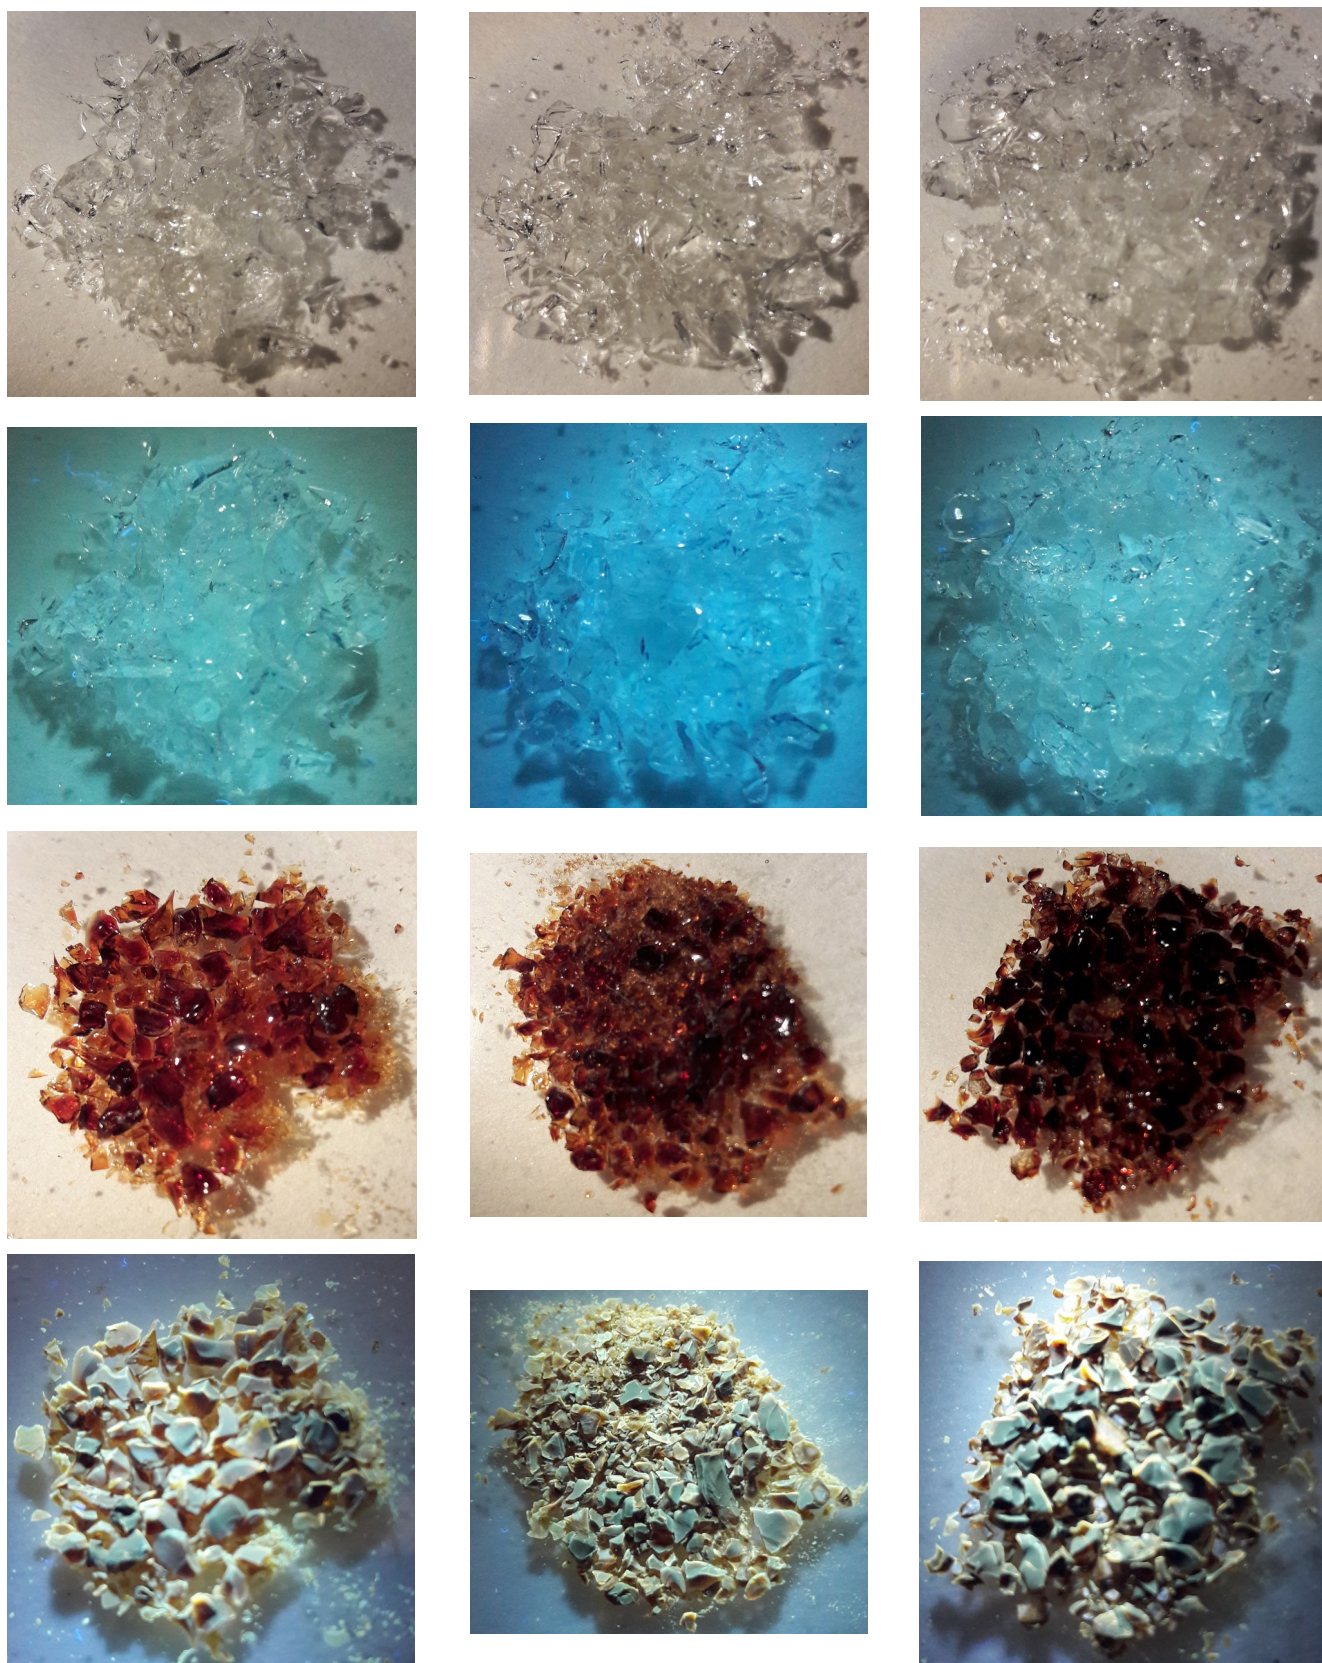

Figure S2: photographs of the sol-gel glasses obtained from silicate-citrate-thiourea precursors. From left to right: citric acid-to-thiourea ratio 1:1, 1:1.5, 1:3. Top down: dried at 105°C and exposed to white flashlight irradiation; dried at 105°C and exposed to UV-blue flashlight irradiation; thermally treated at 270°C and exposed to white flashlight irradiation; thermally treated at 270°C and exposed to UV-blue flashlight irradiation
